# Supplementary material
Source: MDPI journal article supplement (https://www.mdpi.com/2076-3417/12/24/12908)
Supplement: s1 [file s1]

**Table 5.** The significant parameters of consensus secondary structures of precursor miRNAs.

| <b>miRNA ID</b> | <b>Length of miRNA</b> | <b>Length of precursor</b> | <b>MFE* (kcal/mol)</b> | <b>AMFE**</b> | <b>MFEI***</b> | <b>(G+C)%</b> | <b>ΔG**** (kcal/mol)</b> |
|-----------------|------------------------|----------------------------|------------------------|---------------|----------------|---------------|--------------------------|
| hbr-miR159a     | 21                     | 221                        | -80.50                 | -36.42        | -0.86          | 42            | -18.90                   |
| hbr-miR396a     | 21                     | 86                         | -33.20                 | -38.60        | -1.07          | 36            | -22.50                   |
| hbr-miR396b     | 21                     | 154                        | -64.20                 | -41.68        | -0.92          | 45            | -19.40                   |
| hbr-miR398      | 21                     | 140                        | -39.70                 | -28.35        | -0.56          | 50            | -18.80                   |
| hbr-miR408b     | 22                     | 120                        | -55.80                 | -46.50        | -1.01          | 46            | -19.90                   |
| hbr-miR482a     | 22                     | 113                        | -52.00                 | -46.01        | -1.02          | 45            | -24.20                   |
| hbr-miR6167     | 20                     | 140                        | -101.30                | -72.35        | -1.26          | 57            | -21.10                   |
| hbr-miR6169     | 21                     | 157                        | -30.60                 | -19.49        | -0.72          | 27            | -16.70                   |
| hbr-miR6171     | 21                     | 161                        | -42.60                 | -26.45        | -0.66          | 40            | -19.20                   |
| hbr-miR6483     | 22                     | 119                        | -16.50                 | -13.86        | -0.49          | 28            | -11.80                   |
| hbr-miR6484     | 21                     | 108                        | -23.10                 | -21.38        | -0.59          | 36            | -17.50                   |

\*MFE means Minimum Free Energy, \*\*AMFE means Adjusted Minimum Folding Free Energy, \*\*\*MFEI means Minimum Folding Free Energy Index, \*\*\*\*ΔG means minimum free energy of duplex formation AMFE= MFE/Length of a pre-miRNAx100 MFEI= (MFE/Length of a pre-miRNAx100)/(G+C)%
